# Supplementary material for: Arabidopsis SIGMA FACTOR BINDING PROTEIN1 (SIB1) and SIB2 inhibit WRKY75 function in abscisic acid-mediated leaf senescence and seed germination
Source: PubMed Central journal article supplement (PMC8730687; doi:10.1093/jxb/erab391), 2021-08-26
Supplement: erab391_suppl_supplementary_figures_s1-s3_table_s1.pdf [file erab391_suppl_supplementary_figures_s1-s3_table_s1.pdf]

---

**Supplementary data:**

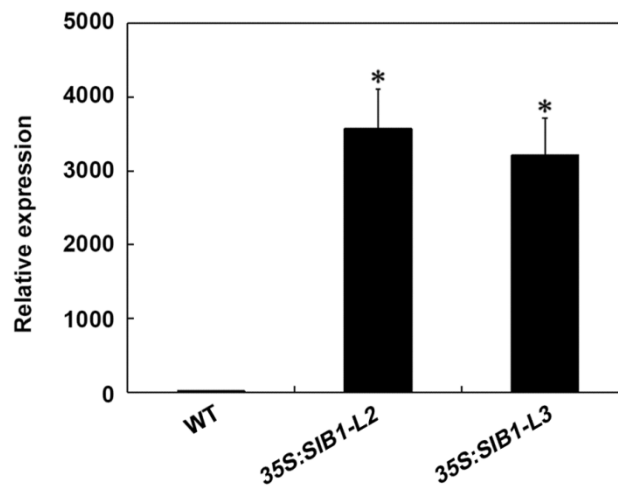

**Fig. S1. Determination of *SIB1* overexpressing plants.** qRT-PCR analysis for *SIB1*-overexpressing plants. Transcript levels of *SIB1* in WT were arbitrarily set to 1. *ACTIN2* and *UBQ5* were used as internal controls. Values are means ± SD of three independent biological replicates. \*  $P < 0.05$ , Student's t-test compared with WT.

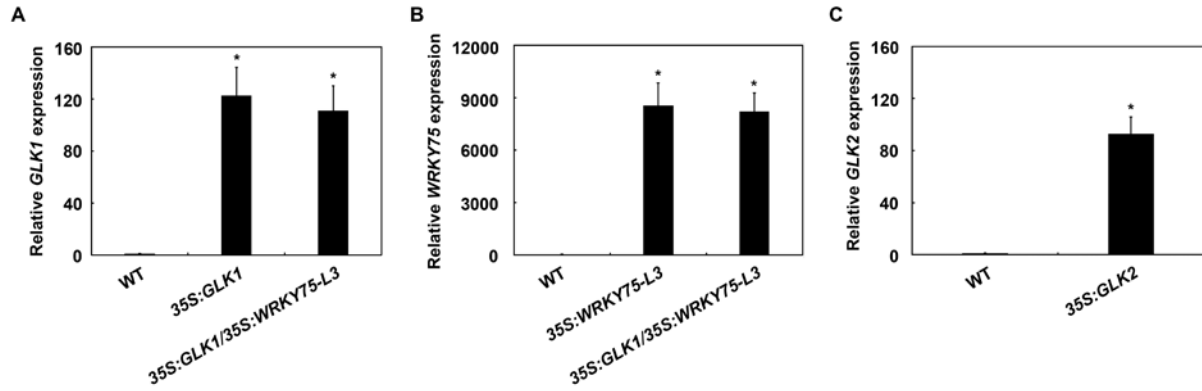

**Fig. S2. Determination of *GLK1*, *GLK2* and *WRKY75* overexpressing plants.** qRT-PCR analysis for *GLK1*-, *GLK2*- and *GLK1/WRKY75*-overexpressing plants. Transcript levels of *GLK1*, *GLK2* or *WRKY75* in WT were arbitrarily set to 1. *ACTIN2* and *UBQ5* were used as internal controls. Values are means  $\pm$  SD of three independent biological replicates. \*  $P < 0.05$ , Student's t-test compared with WT.

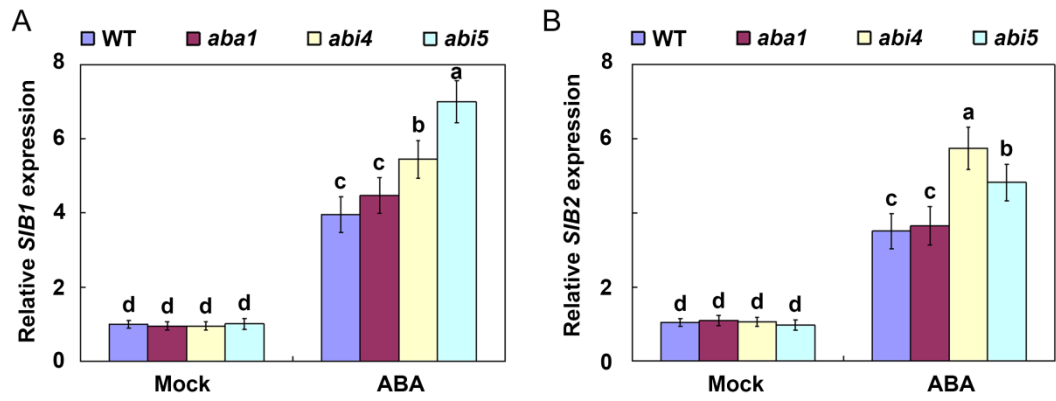

**Fig. S3. Determination of *SIBs* expression in ABA synthesis or signaling mutants.** qRT-PCR analysis of *SIBs* in the indicated genotypes. Transcript levels of *SIB1* and *SIB2* in non-treated WT leaves were arbitrarily set to 1. *ACTIN2* and *UBQ5* were used as internal controls. Error bars represent  $\pm$ SD from three independent biological replicates. Bars with different letters are significantly different from each other (ANOVA;  $P < 0.05$ ).

---

## Supplementary Table S1.

### Primers used to qRT-PCR analysis of gene expression:

|            |                           |
|------------|---------------------------|
| GLK1-q1:   | CCAAACACTTACCTCCGCCT      |
| GLK1-q2:   | GGCGGTGCTCTAAATCTCGT      |
| GLK2-q1:   | TTCAAGCATCGGTGTTCCCA      |
| GLK2-q2:   | TTCAGTCCCAAAGGAAGCGG      |
| SAG12-q1:  | ATCCAAAAGCAACTTCTATTACAGG |
| SAG12-q2:  | CCACTGCCTTCATCAGTGC       |
| SAG29-q1:  | GCCACCAGGGAGAAAAGG        |
| SAG29-q2:  | CCACGAAATGTGTTACCATTAGAA  |
| SIB1-q1:   | CGACTTTTCTCACCACGACA      |
| SIB1-q2:   | TCGGAGGAAGGGGAATAGAT      |
| SIB2-q1:   | GTCAAGACGCCGCTGATCTA      |
| SIB2-q2:   | GCCGACATCTGAGGAGCATT      |
| WRKY75-q1: | ATATGGCCAAAAGGCCGTCA      |
| WRKY75-q2: | TGCTCGAAGTTTTCGGTGGA      |
| ACTIN2-q1: | TGTGCCAATCTACGAGGGTTT     |
| ACTIN2-q2: | TTTCCCGCTCTGCTGTTGT       |
| UBQ5-q1:   | GTTAAGCTCGCTGTTCTTCAGT    |
| UBQ5-q2:   | TCAAGCTTCAACTCCTTCTTTC    |

### Primers used to LCI analysis:

|                |                                     |
|----------------|-------------------------------------|
| cLUC-SIB1-1:   | ATCCCGGGGCATGGAGTCATCATCGTCGACTTTT  |
| cLUC-SIB1-2:   | ATCCCGGGTTCACATAGAATCGATGCTTCCAAA   |
| cLUC-SIB2-1:   | ATCCCGGGGCATGGATCAGTCATCATCAACGTTG  |
| cLUC-SIB2-2:   | ATCCCGGGTTCAGAGAGAACCAATGCTTCCTAAA  |
| nLUC-WRKY75-1: | ATCCCGGGGCATGGAGGGATATGATAATGGGTC   |
| nLUC-WRKY75-2: | ATCCCGGGTGAAAGAAGAGTAGATTTGCATTTGAG |

### Primers used to yeast two hybrid:

|              |                                     |
|--------------|-------------------------------------|
| AD-SIB1-1:   | ATAGAATTCATGGAGTCATCATCGTCGACTTTT   |
| AD-SIB1-2:   | ATAGGATCCATTATCACATAGAATCGATGCTTCCA |
| AD-SIB2-1:   | ATAGAATTCATGGATCAGTCATCATCAACGTT    |
| AD-SIB2-2:   | ATAGAGCTCTCAGTGCCGAAACAAAACATT      |
| BD-WRKY75-1: | AAGAATTCATGGAGGGATATGATAATGGG       |
| BD-WRKY75-2: | ATAGGATCCCTAGAAAGAAGAGTAGATTTGCATT  |

### Primers used to transactivation analysis:

|              |                                      |
|--------------|--------------------------------------|
| GLK1p-LUC-1: | ATCCCGGGTAGCTATTTCCAAGTTAACAGGAGAATC |
| GLK1p-LUC-2: | ATCCCGGGCGATCAATCTTCACTTGTTAGATCCAA  |
| 35S-SIB1-1:  | ATGGATCCATGGAGTCATCATCGTCGACTTTT     |
| 35S-SIB1-2:  | ATTCTAGATCACATAGAATCGATGCTTCCAAA     |
| 35S-SIB2-1:  | ATTCTAGAATGGATCAGTCATCATCAACGTTG     |

---

35S-SIB2-2: ATGTCGACTCAGAGAGAACCAATGCTTCCTAAA  
35S-WRKY75-1: ATGGATCCATGGAGGGATATGATAATGGGTC  
35S-WRKY75-2: ATGTCGACCTAGAAAGAAGAGTAGATTTGCATTG

**Primers used to mutant identification:**

WRKY75-m1: TTGGAGATTGATTCTGAATTGG  
WRKY75-m2: AACACGTACACGACGTCATTG  
WRKY75-m3: TCGAGCATATTCTCACTCAAATGC  
WRKY75-m4: GGATCCAAAGATTCAGGCTCAATTAC  
Spm32: TACGAATAAGAGCGTCCATTTTAGAGTGA  
Salk-KO: AAACGTCCGCAATGTGTTAT  
sib1-4-LP: CGATGAGAACTCGATAACCTGAC  
sib1-4-RP: AATCATCCCACCTATCGGAAG  
sib2-1-LP: GCGTCTATTATACAGAGATGGGG  
sib2-1-RP: TGTCATGGAGACACGATGAAC  
sm\_KO: TACGAATAAGAGCGTCCATTTTAGAGTGA

**Primers used to generate SIB1 overexpression transgenic plants:**

35S-SIB1-GFP-1: ATGGATCCATGGAGTCATCATCGTCGACTTT  
35S-SIB1-GFP-2: ATTCTAGACATAGAATCGATGCTTCCAAAGTC

**Primers used to Pull-Down:**

GST-SIB1-1: ATGGATCCATGGAGTCATCATCGTCGACTTT  
GST-SIB1-2: ATGAATTCATAGAATCGATGCTTCCAAAGTC  
GST-SIB2-1: ATGAATTCATGGATCAGTCATCATCAACGTTG  
GST-SIB2-2: ATCTCGAGGAGAGAACCAATGCTTCCTAAAGC  
His-WRKY75-1: ATGGATCCATGGAGGGATATGATAATGGGTC  
His-WRKY75-2: ATGAATTCGAAAGAAGAGTAGATTTGCATTTGAG

**Primers used to qRT-PCR amplification of *GLK1* or *GLK2* promoter:**

GLK1-W1-1: CAAAACCACTCAAATATTCAACT  
GLK1-W1-2: AATTCCACATACTTTCAGGCC  
GLK1-W2,3-1: CTTCACAGCTTAATTTGCGAG  
GLK1-W2,3-2: CTTGGTTTTGGTCTGTCCCAAC  
GLK1-W4-1: CCACATTTAGAACTAGGCATAT  
GLK1-W4-2: GATACATGTAAACATCTGATCGTTTG  
GLK2-W1-1: GAGGCACCAATTTTTTATGCCAC  
GLK2-W1-2: GTCTCTATAACACATGTTATTGAGTC  
GLK2-W2,3,4-1: ACGCATTTGCTTAATTGCTAGTCG  
GLK2-W2,3,4-2: GACAGTTTCCTTTTAAACATTATGG
